# Supplementary material for: Possibility of highly efficient 2D–3D perovskite/CIGS tandem solar cells with over 30% efficiency
Source: Royal Society of Chemistry journal article supplement (doi:10.1039/d3ta07628h), 2024-01-01
Supplement: d3ta07628h1.pdf [file d3ta07628h1.pdf]

## Possibility of highly efficient 2D-3D perovskite/CIGS tandem solar cells with over 30% efficiency

Eun-Bi Kim<sup>a</sup>, M. Shaheer Akhtar<sup>b</sup>, Cong Liu<sup>c\*</sup>, Yousheng Wang<sup>d\*</sup>, Sadia Ameen<sup>a\*</sup>

<sup>a</sup> Advanced Materials and Devices Laboratory, Department of Bio-Convergence Science, Advanced Science Campus, Jeonbuk National University, 56212, Republic of Korea

<sup>b</sup> New & Renewable Energy Material Development Center (NewREC), Jeonbuk National University, Jeonbuk, Republic of Korea

<sup>c</sup> State Key Laboratory of Featured Metal Materials and Life-cycle Safety for Composite Structures, School of Resources, Environmental and Materials, Guangxi University, Nanning 530004, China

<sup>d</sup> Institute of New Energy Technology, College of Physics & Optoelectronic Engineering, Jinan University, Guangzhou 510632, China

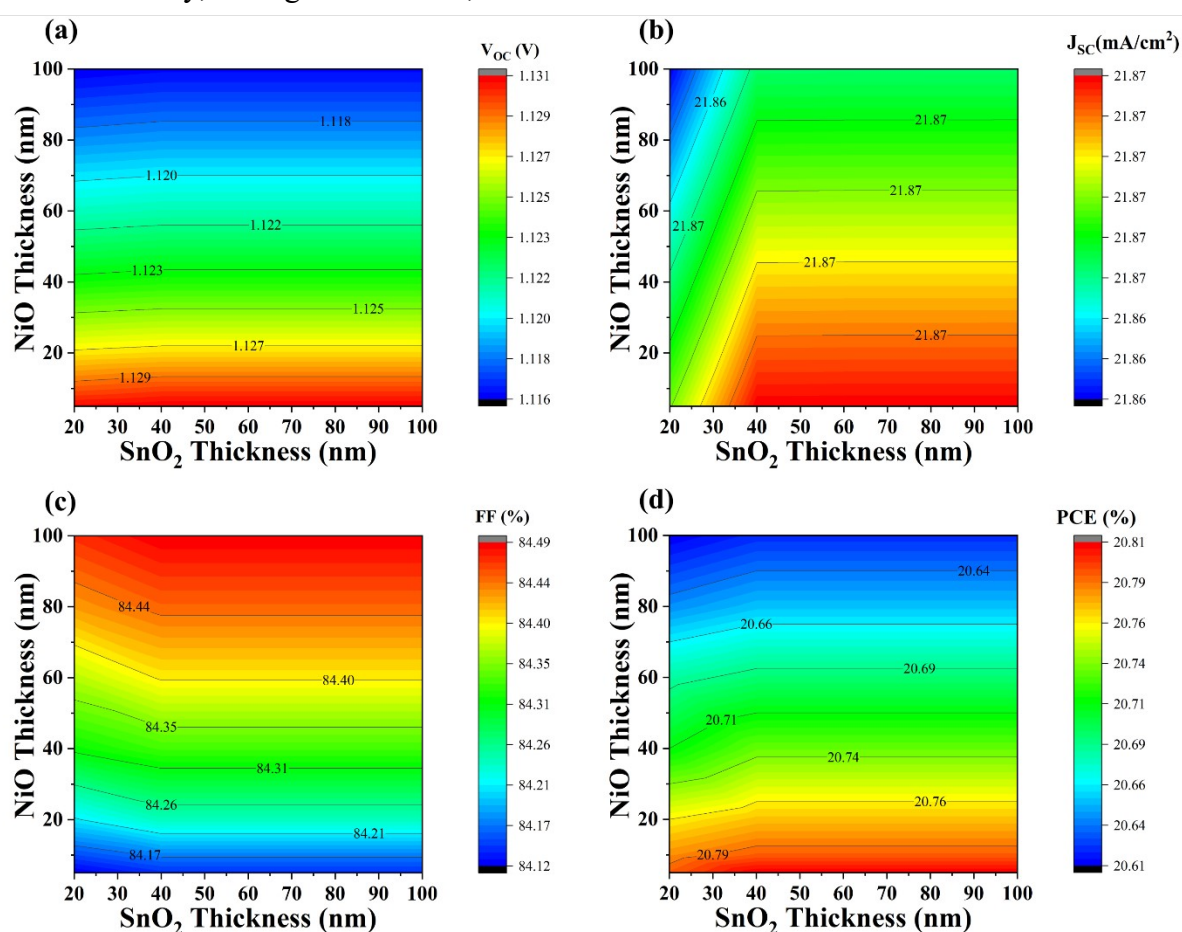

**Fig. S-1** Distribution of photovoltaic parameters (a-d) as a function of NiO thickness and SnO<sub>2</sub> thickness in PSCs.

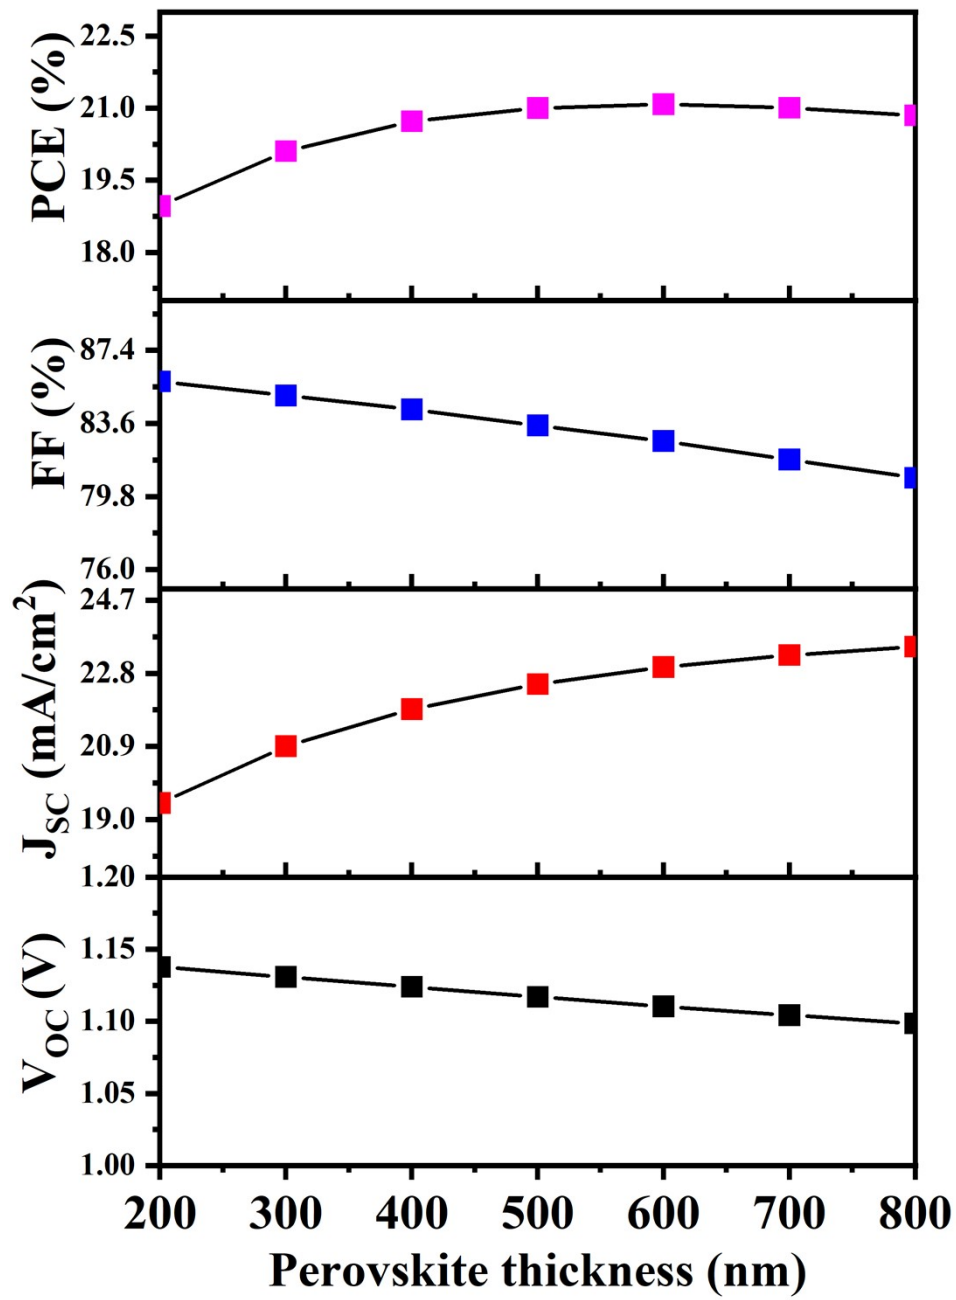

Fig. S-2. Effect of 2D-3D perovskite thicknesses on the photovoltaic parameters of PSCs.

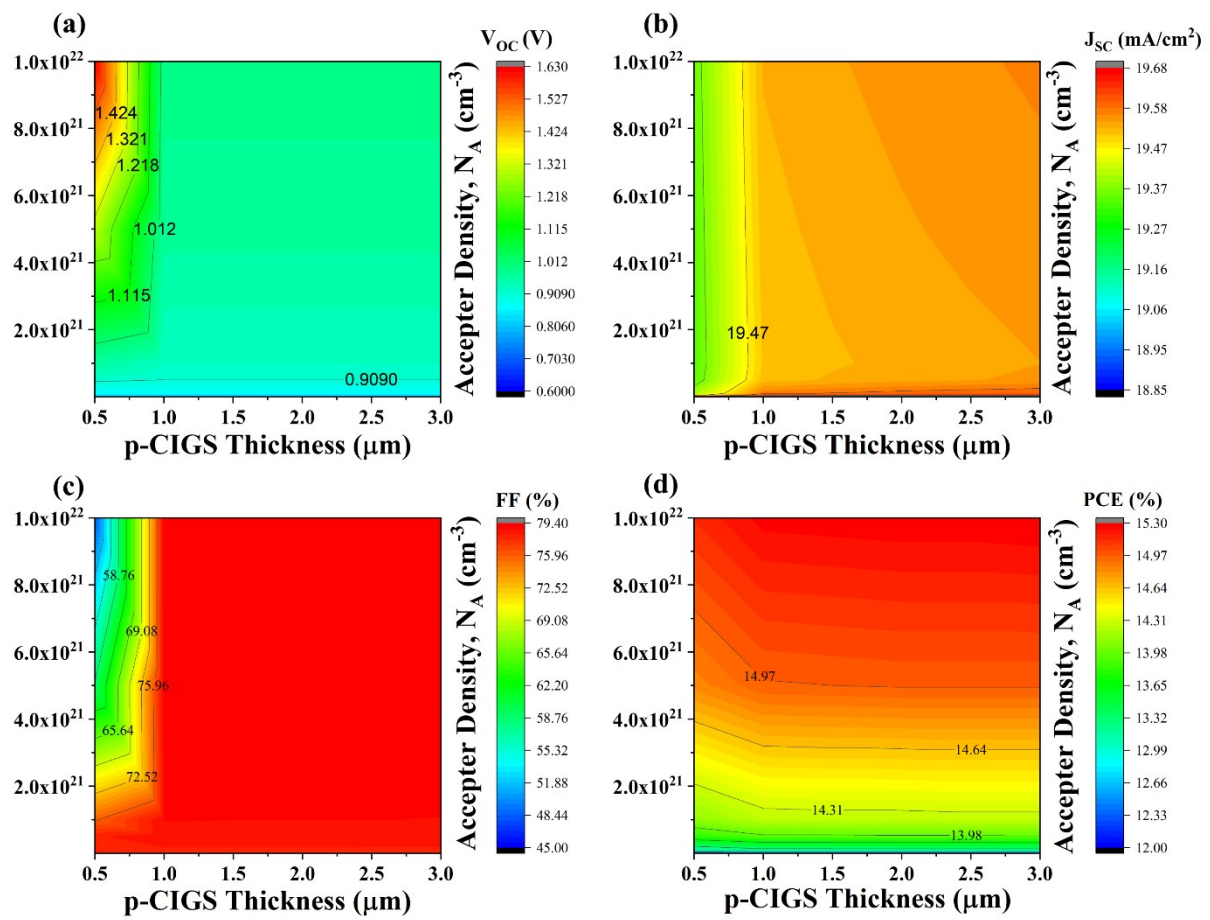

**Fig. S-3** Distribution of photovoltaic parameters (a-d) as a function of acceptor density and p-CIGS thickness in CIGS/GaSe heterojunction solar cells.

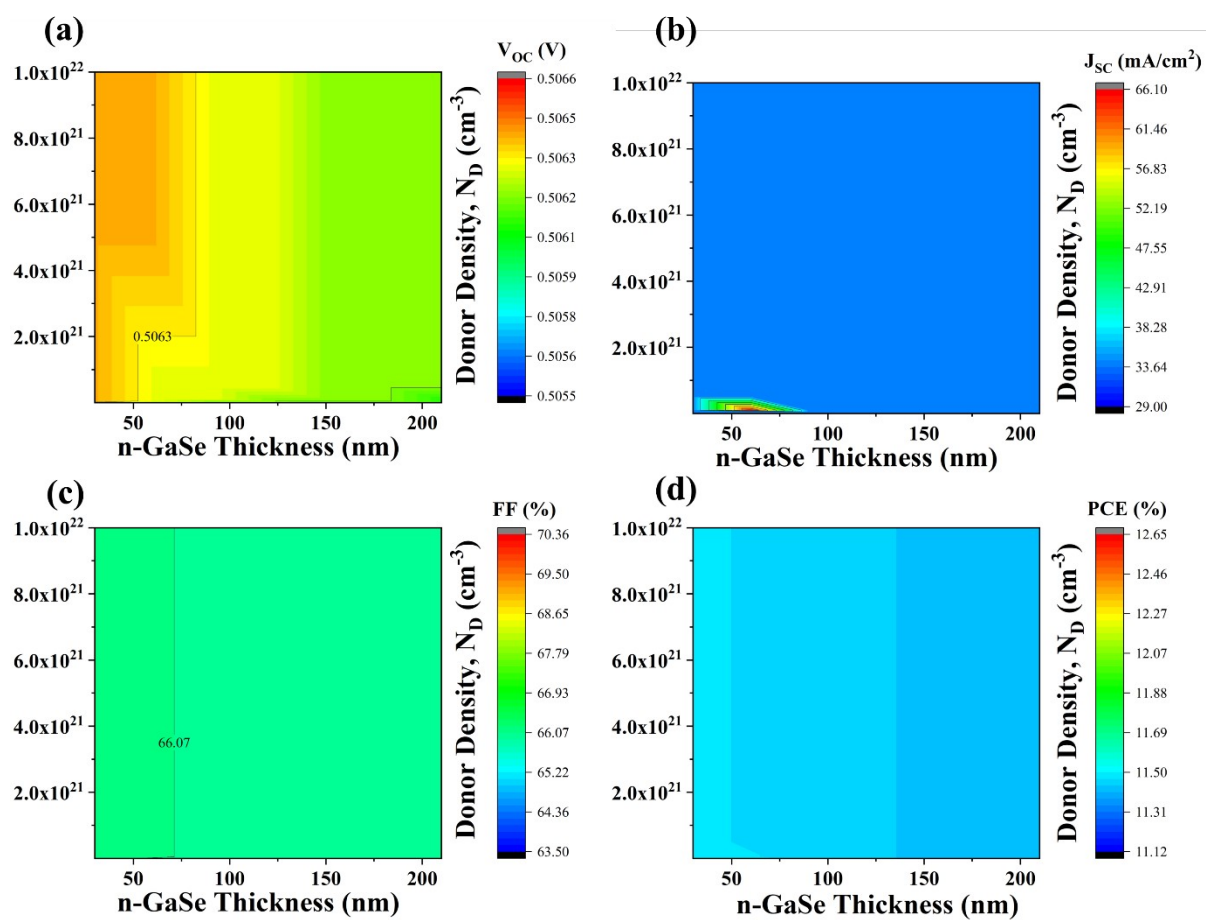

**Fig. S-4** Distribution of photovoltaic parameters (a-d) as a function of donor density and n-GaSe thickness in CIGS/GaSe heterojunction solar cells.

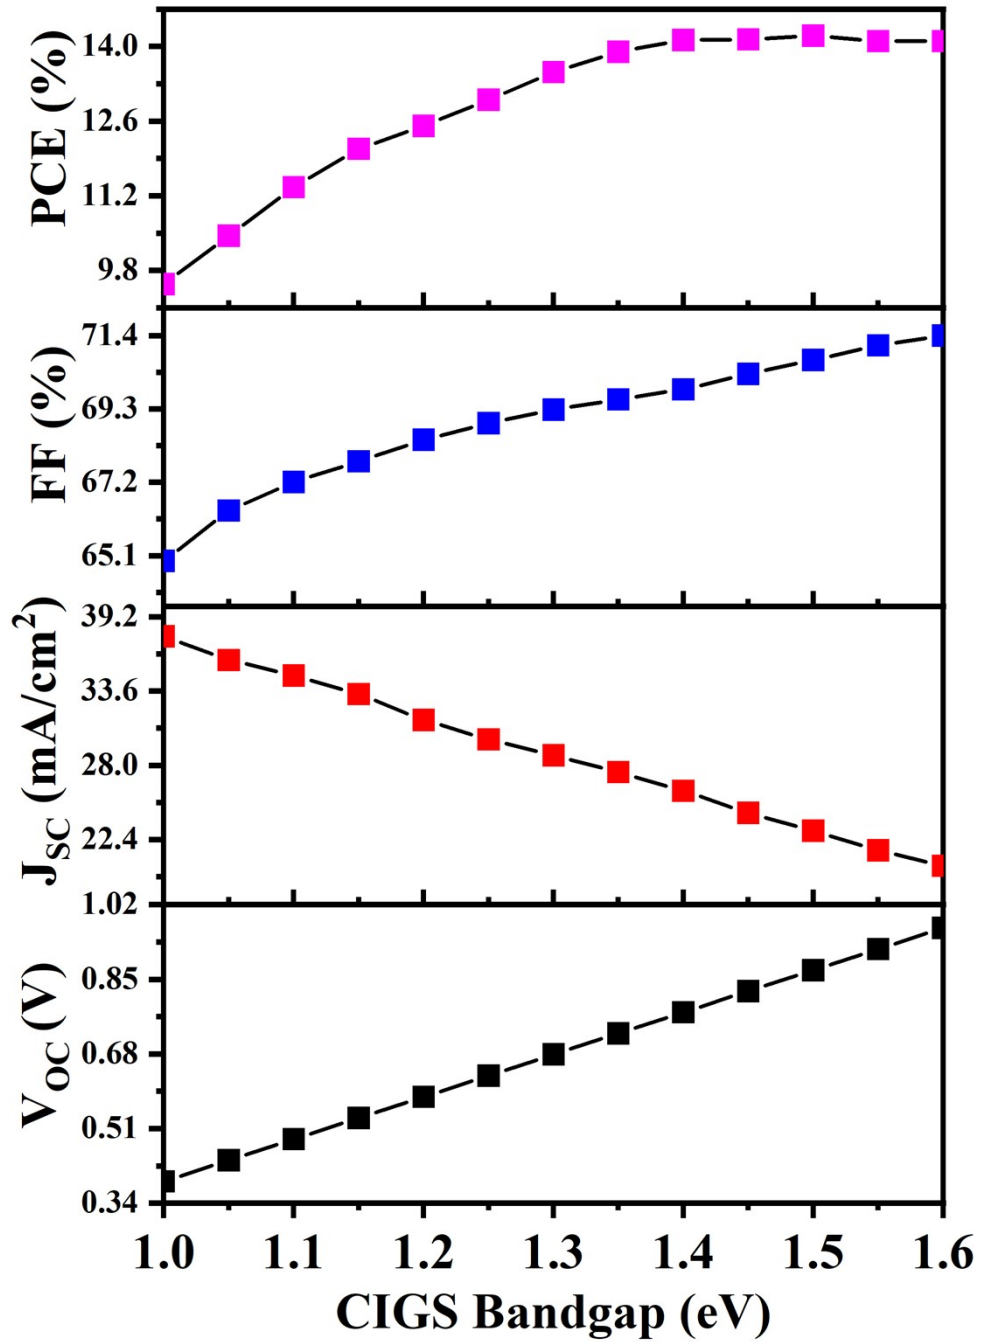

**Fig. S-5** Effect of CIGS bandgaps on the  $V_{oc}$ ,  $J_{sc}$ , FF, and PCE of the p-CIGS/n-GaSe heterojunction bottom cell.
